# Supplementary material for: A 7-year dataset for driving and evaluating snow models at an arctic site (Sodankylä, Finland)
Source: Copernicus journal article supplement (doi:10.5194/gi-2015-35), 2016-01-19

# A 7-year dataset for driving and evaluating snow models at an arctic site (Sodankylä, Finland)

Richard Essery, Anna Kontu, Juha Lemmetyinen, Marie Dumont and Cécile B Ménard

## Supplementary figures

**Figure S1.** Scatter plot and statistics comparing in situ measurements and ERA-Interim forecasts of longwave radiation averaged over periods of 3 hours (blue dots) and a day (red dots).

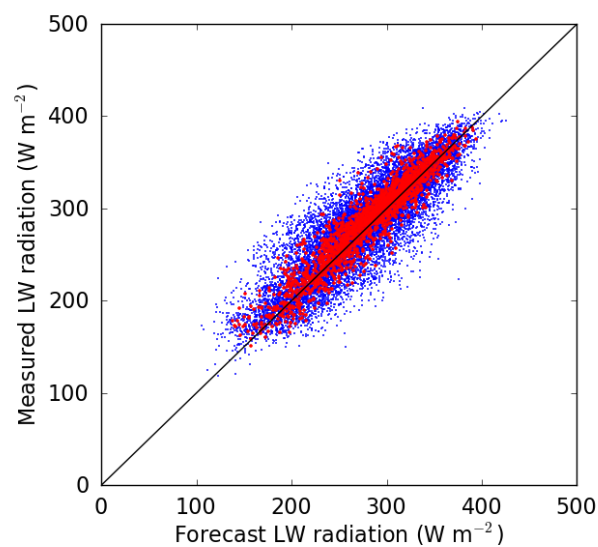

| Period   | Bias (W m <sup>-2</sup> ) | Root mean square error (W m <sup>-2</sup> ) | Correlation |
|----------|---------------------------|---------------------------------------------|-------------|
| 3 hours  | -5.1                      | 26.7                                        | 0.88        |
| 24 hours | -5.1                      | 16.9                                        | 0.94        |

**Figure S2.** Profiles of snow density from manual measurements (black dots), dielectric measurements (white dots) and Crocus simulations (lines).

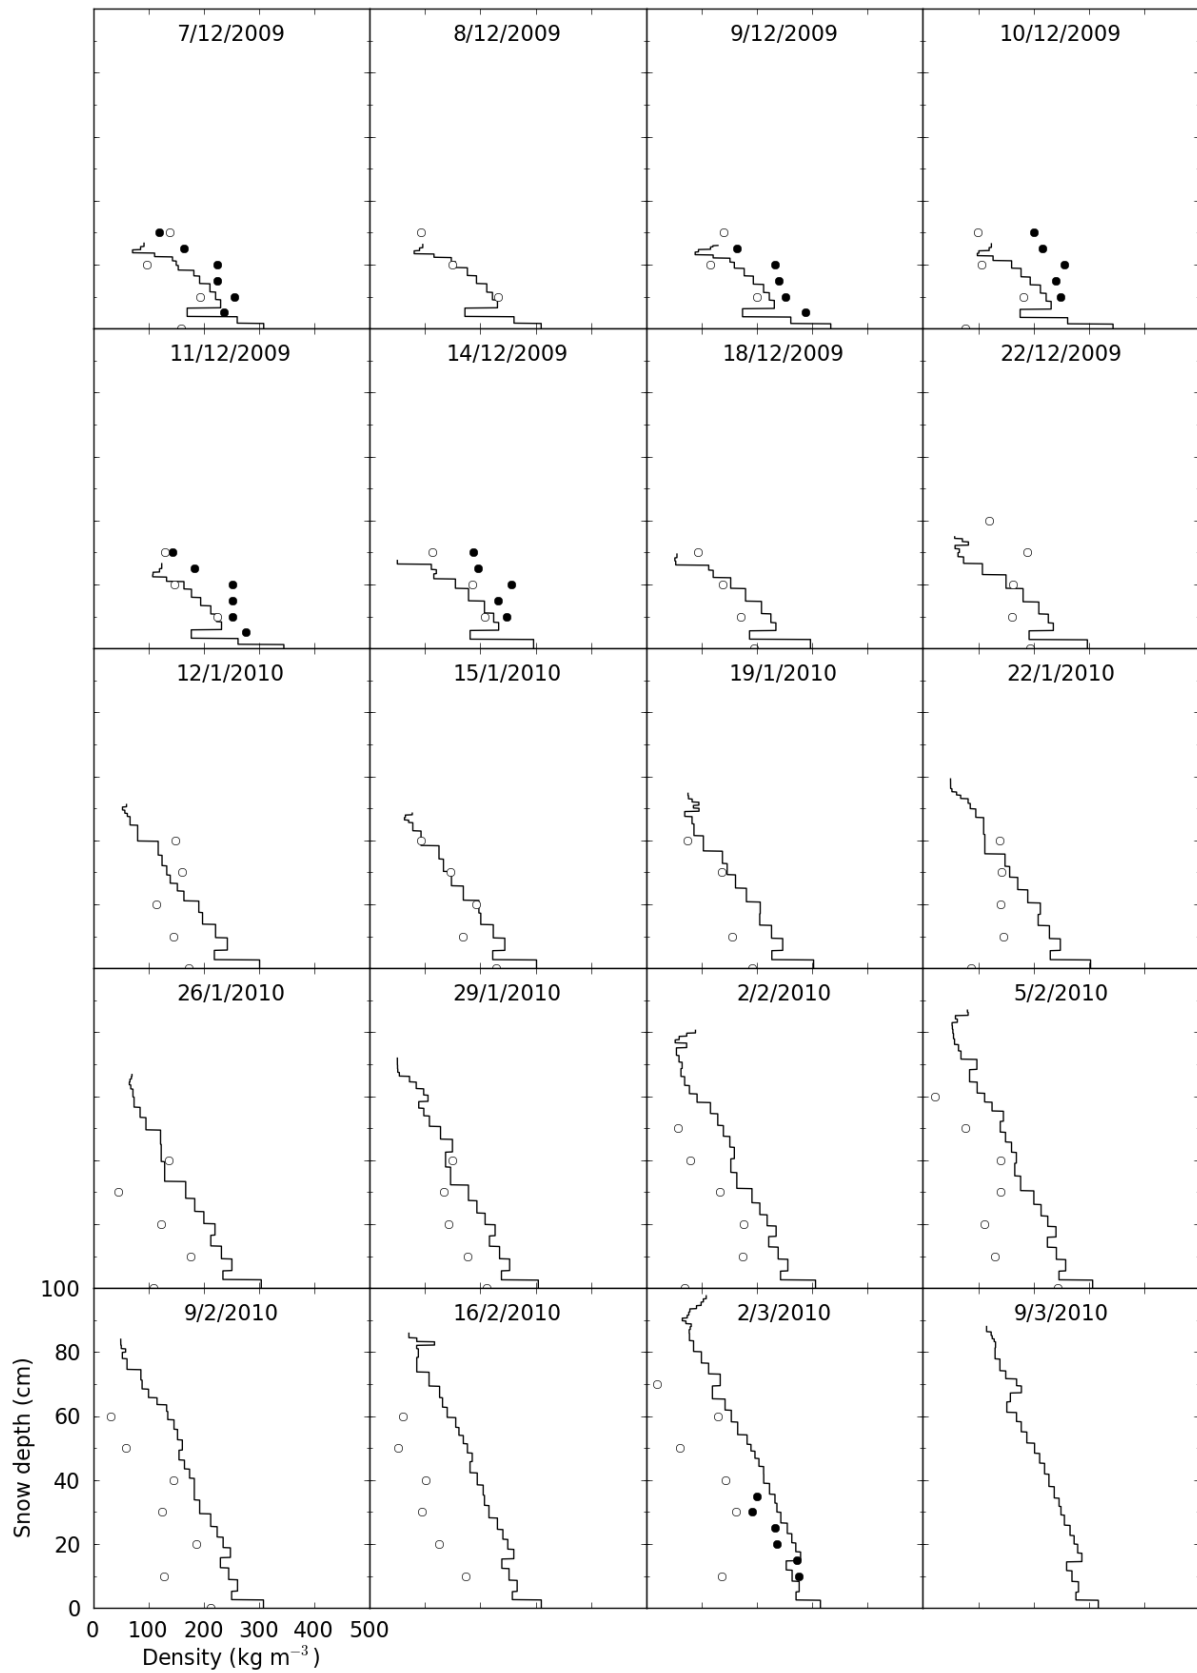

Figure S2. Continued

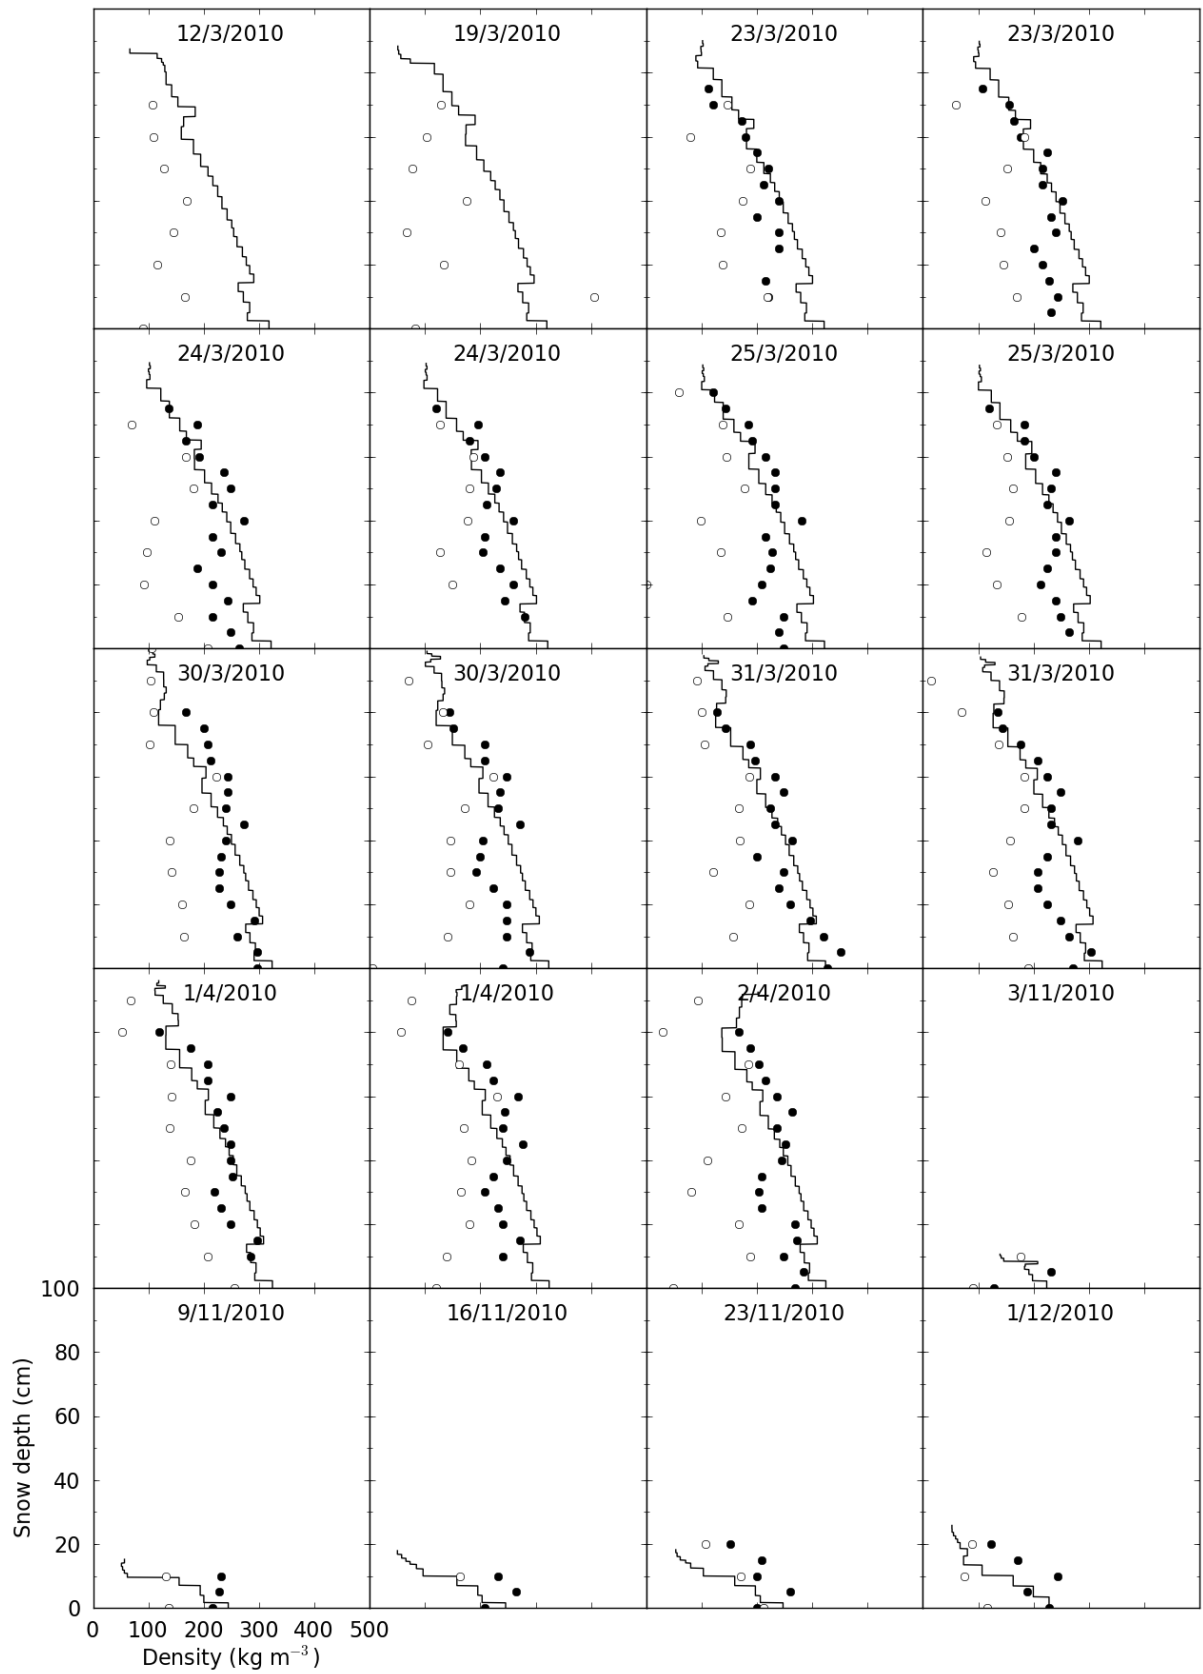

Figure S2. Continued

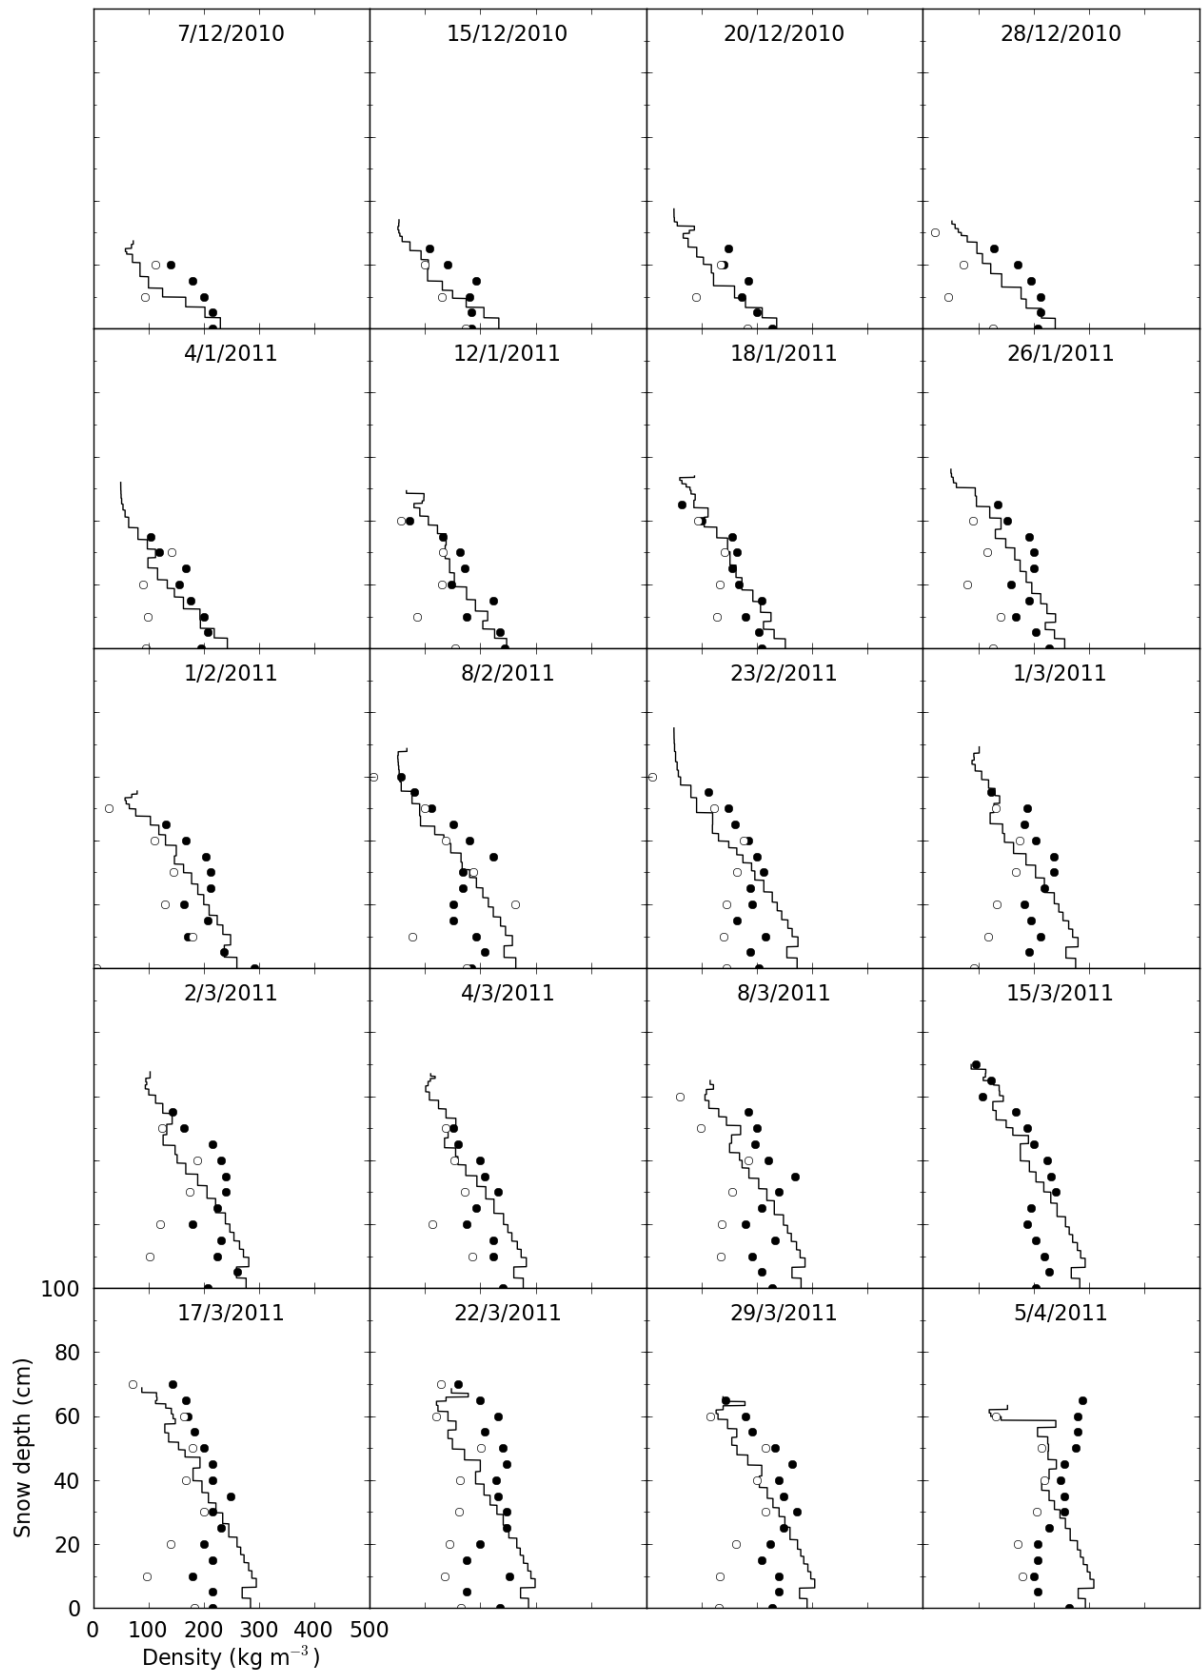

Figure S2. Continued

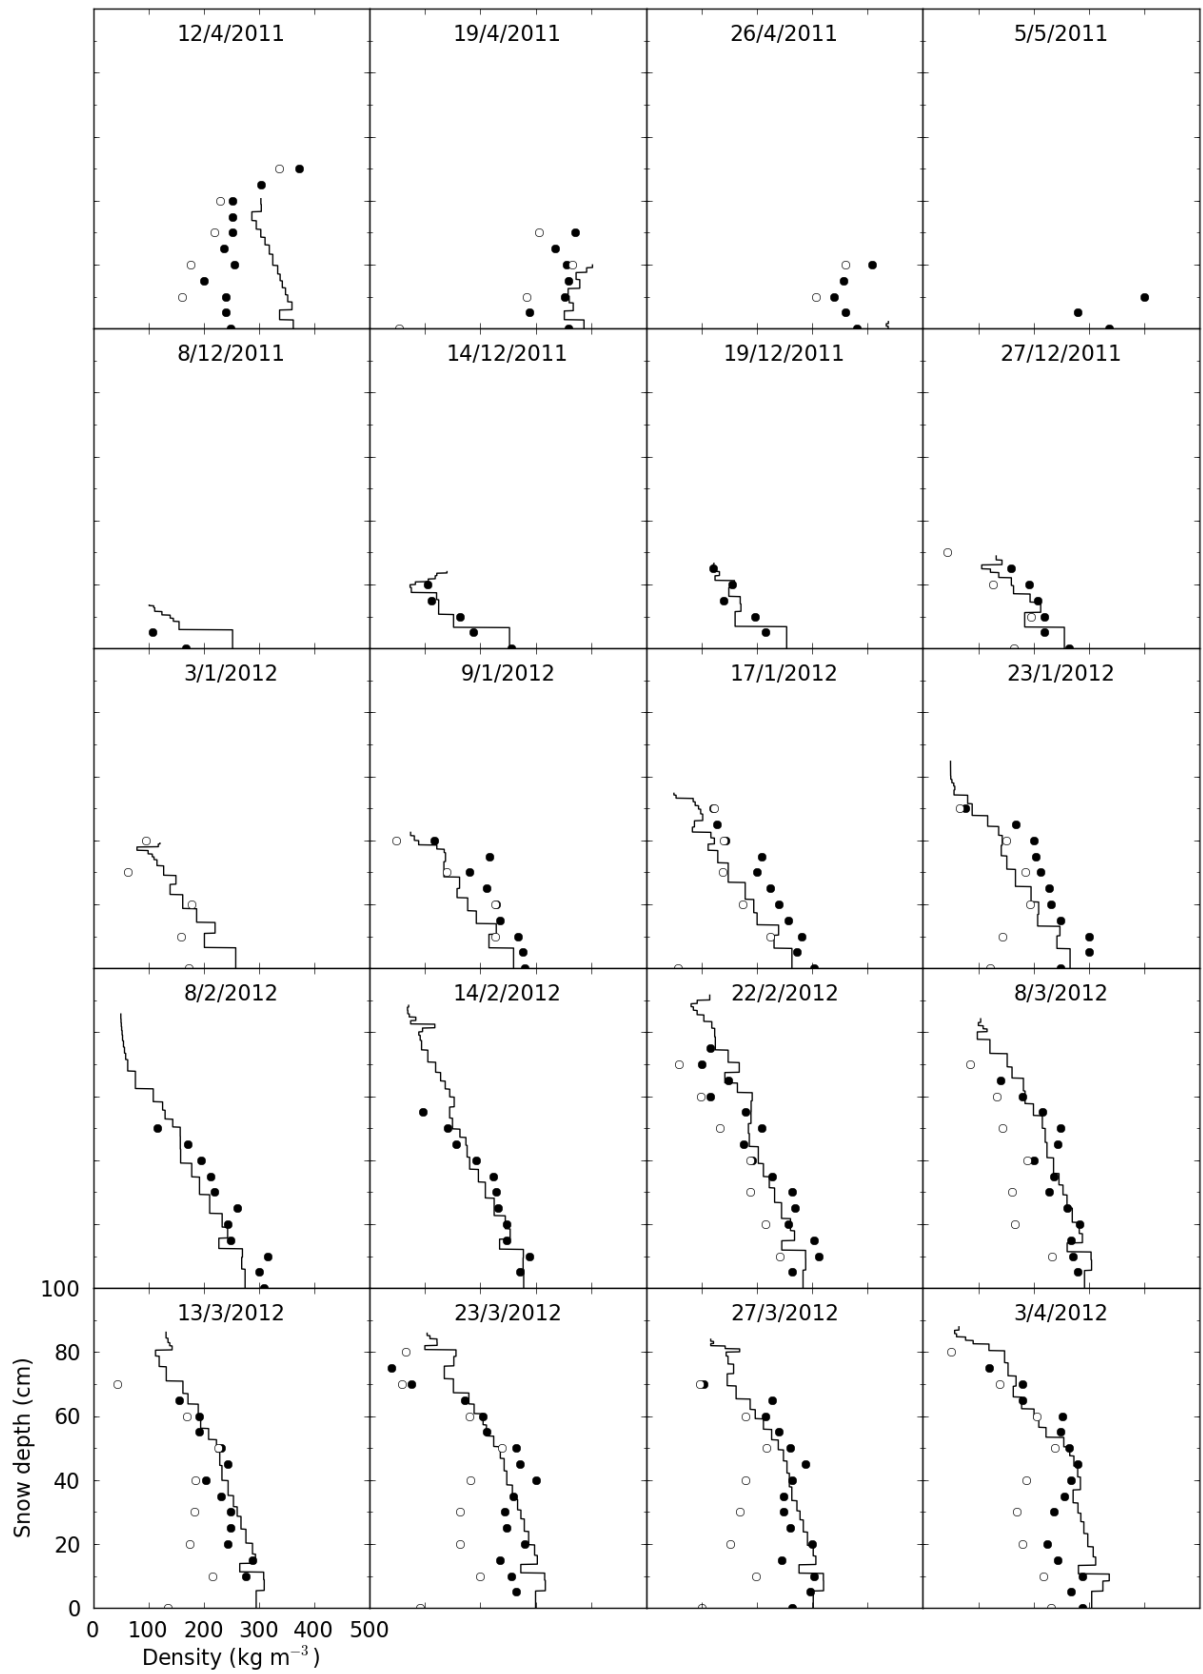

Figure S2. Continued

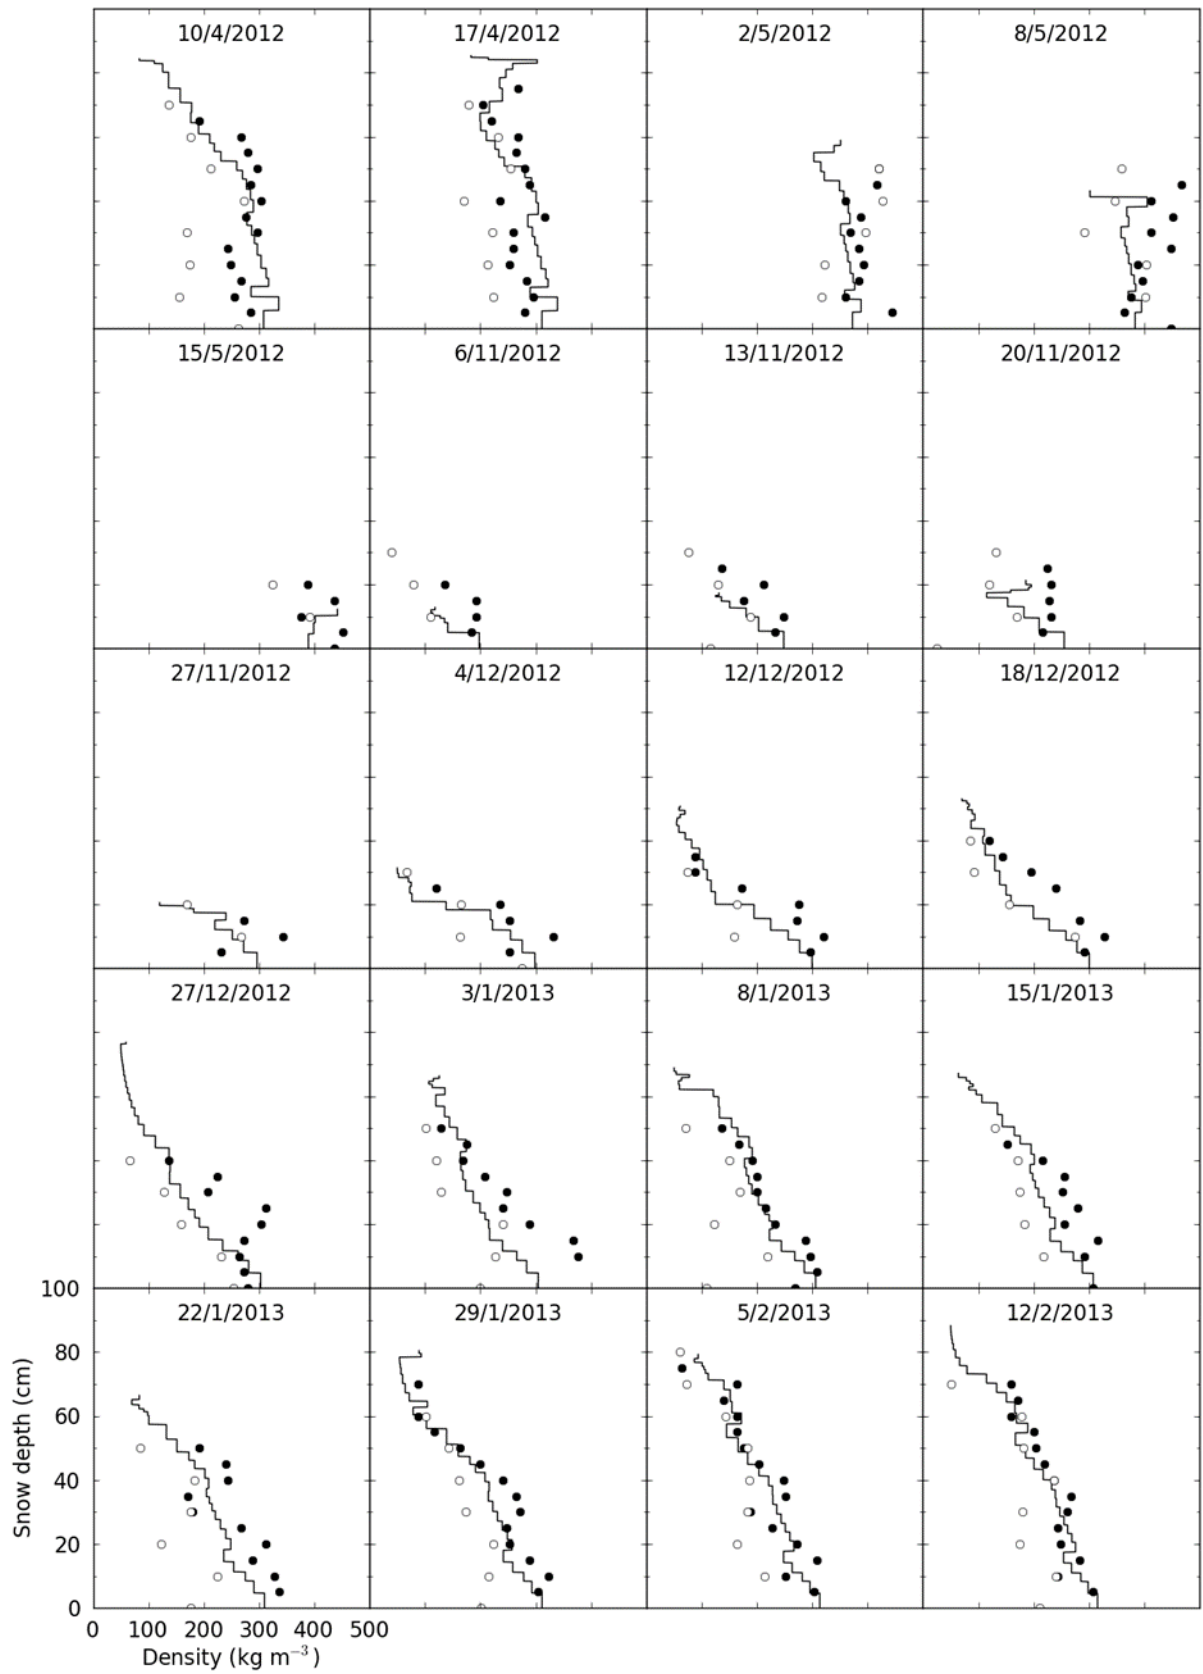

Figure S2. Continued

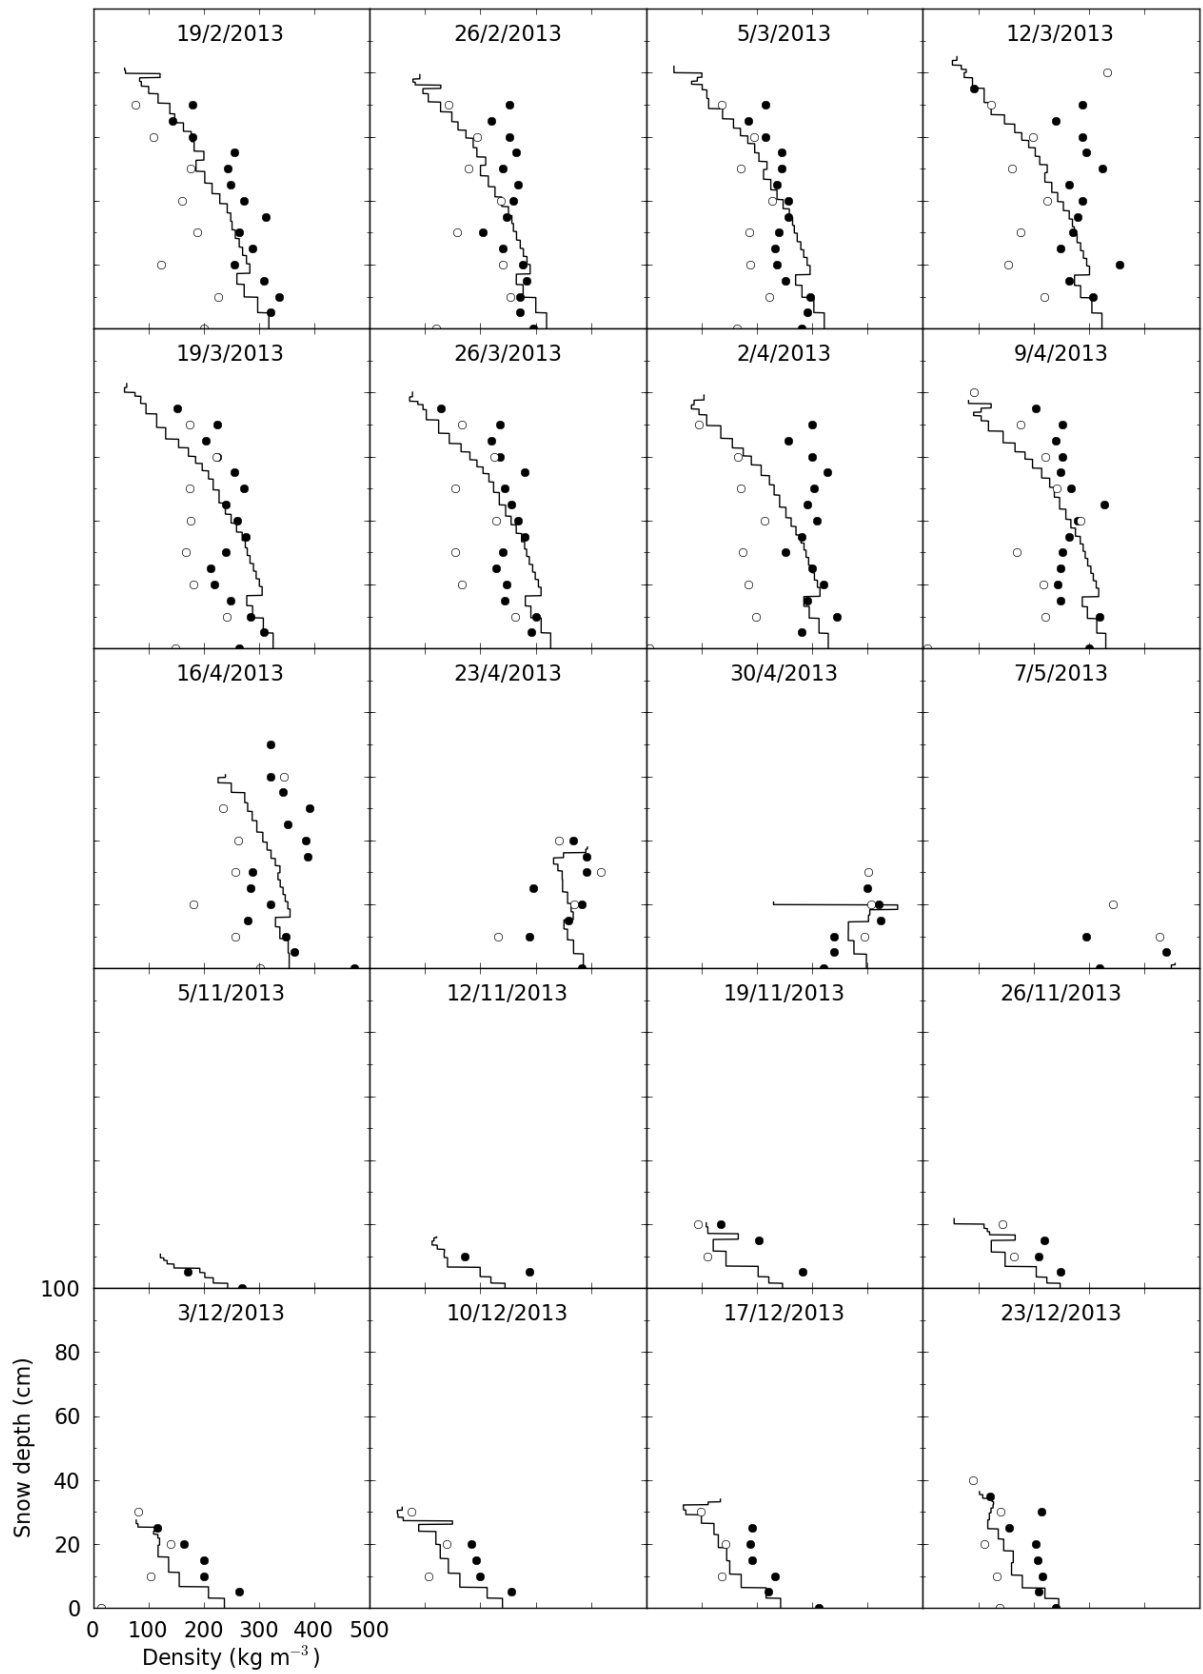

Figure S2. Continued

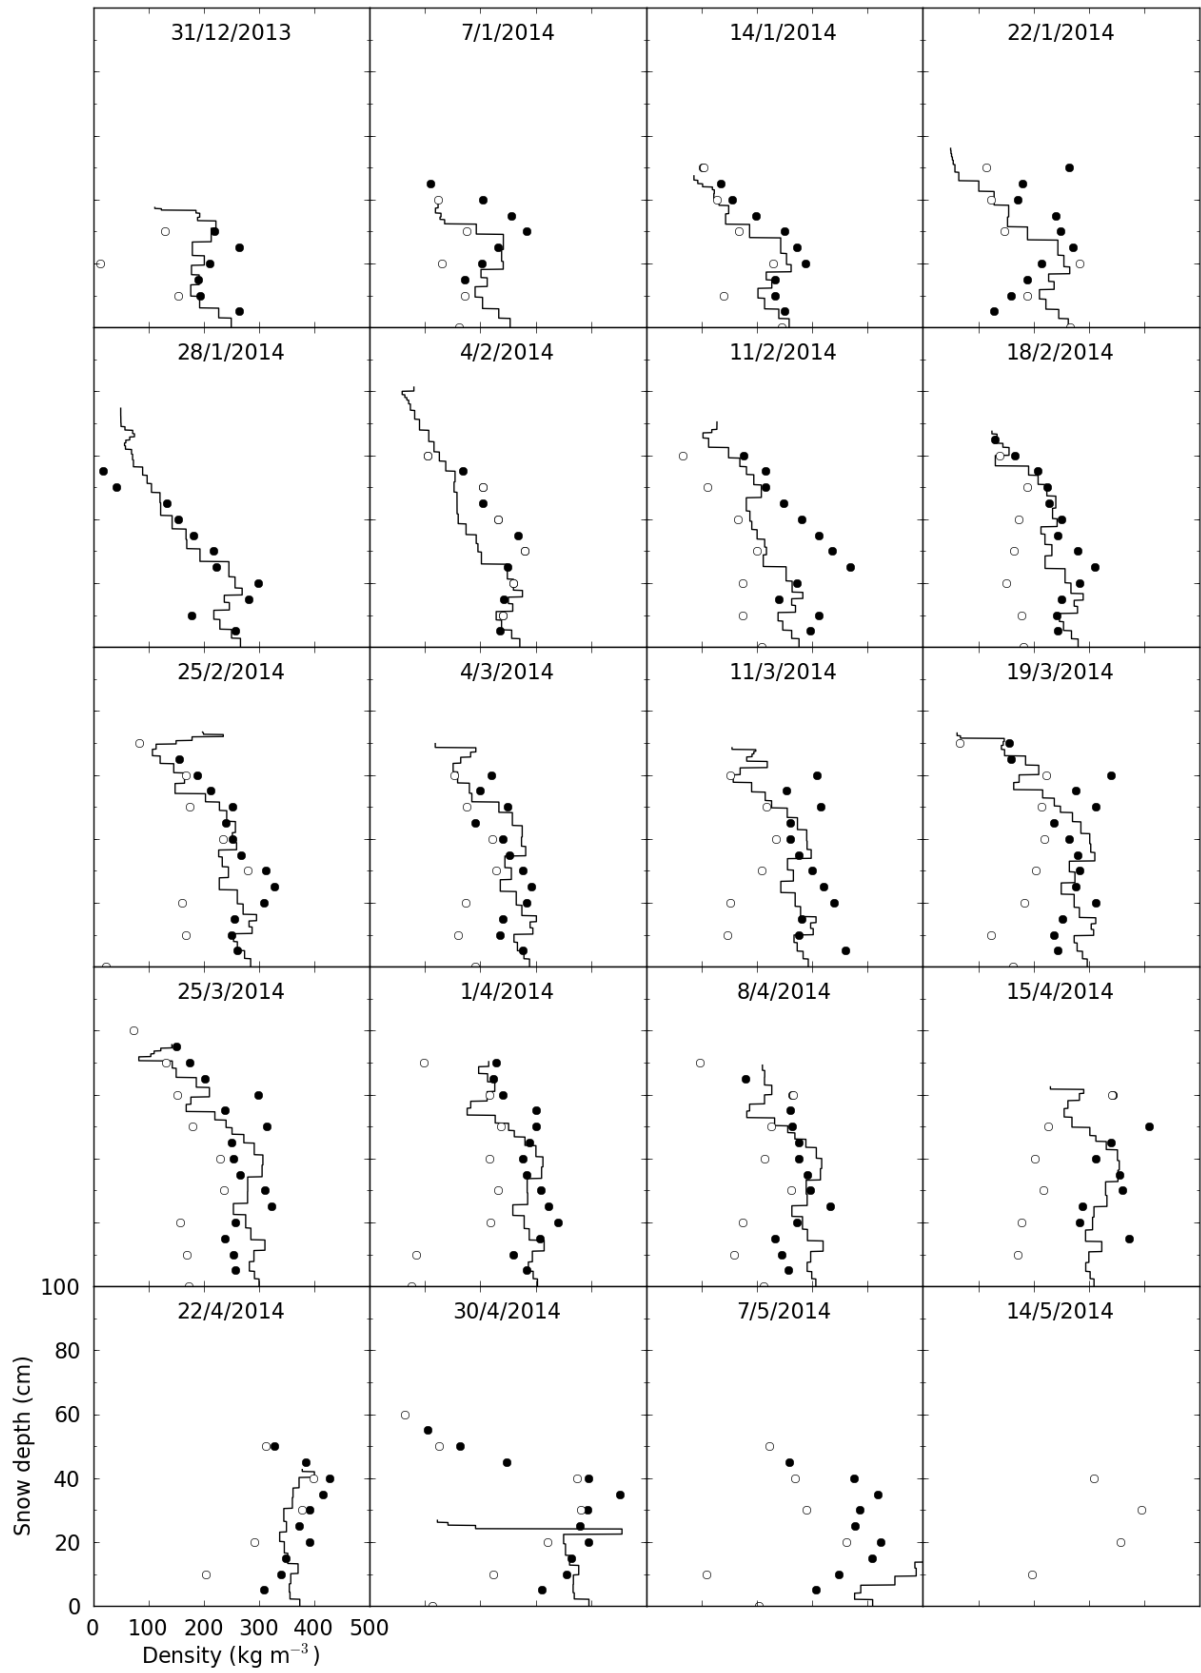



**Figure S1.** Profiles of snow density from manual measurements (black dots), thermistors (white dots) and Crocus simulations (lines).

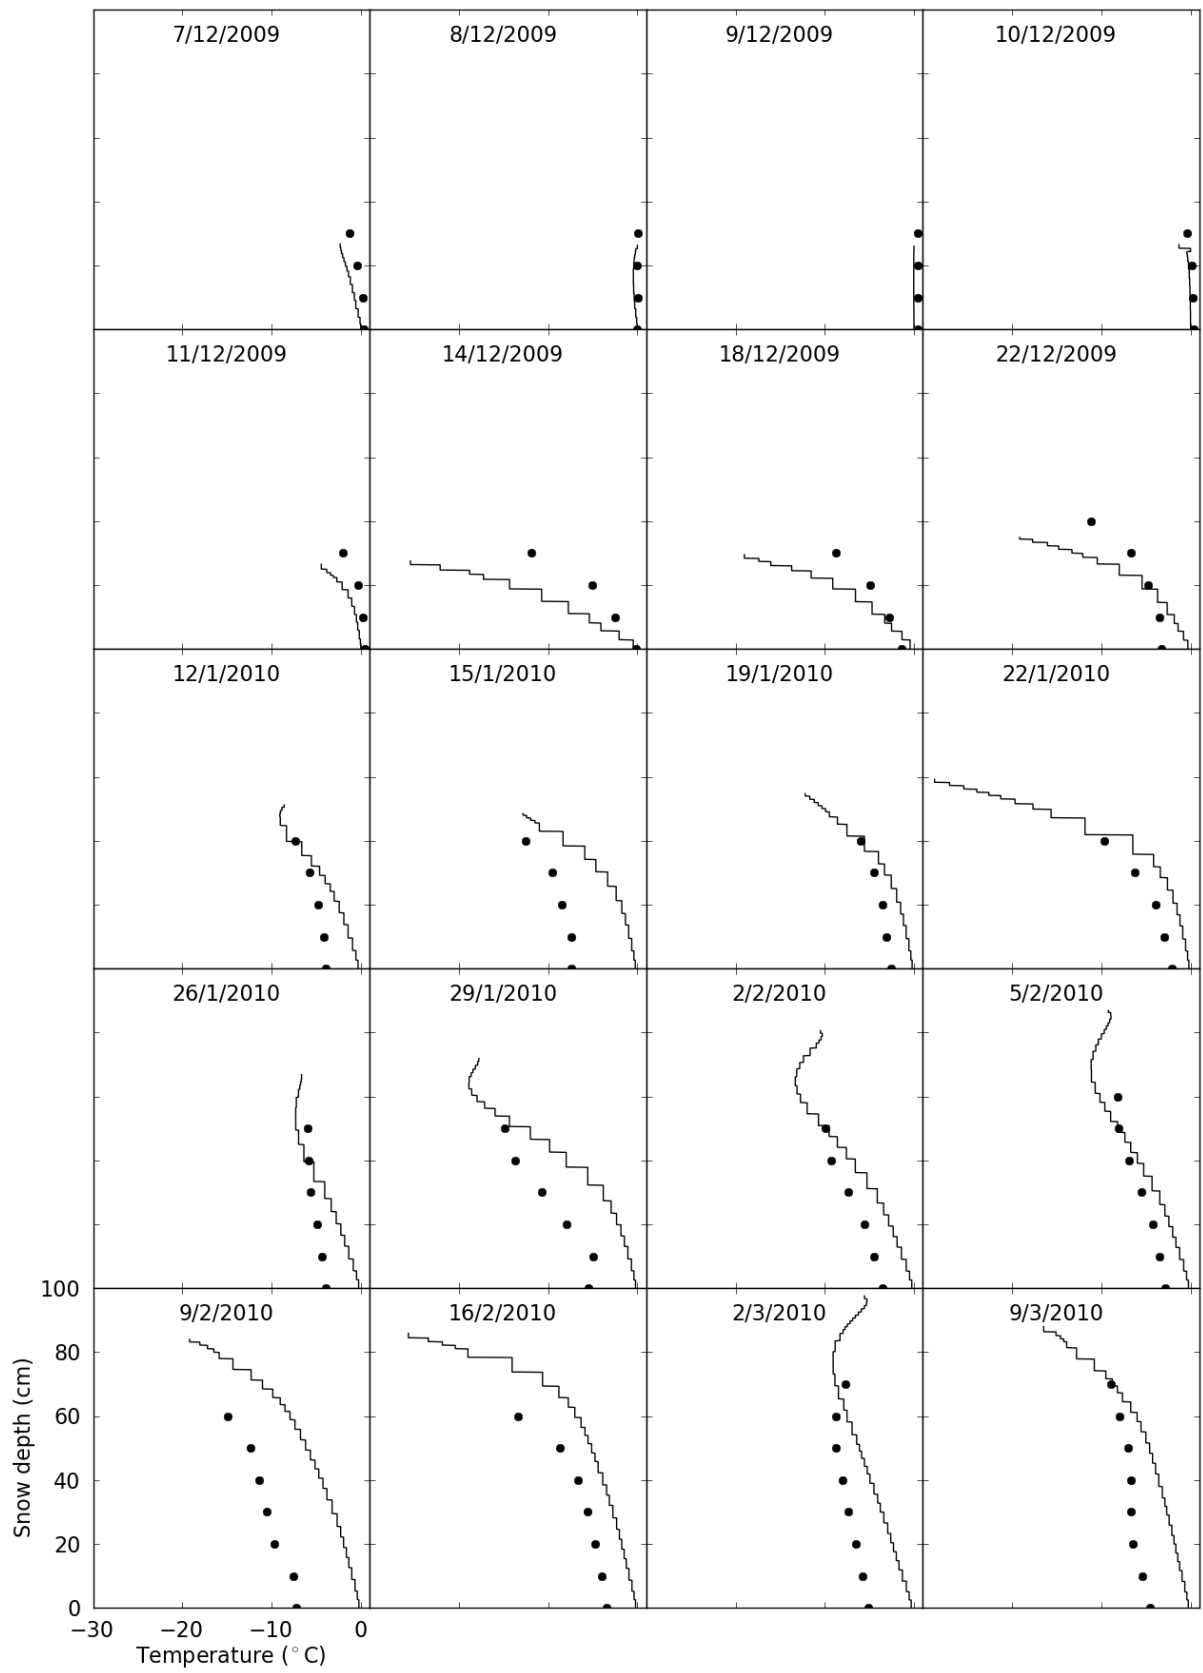

Figure S1. Continued

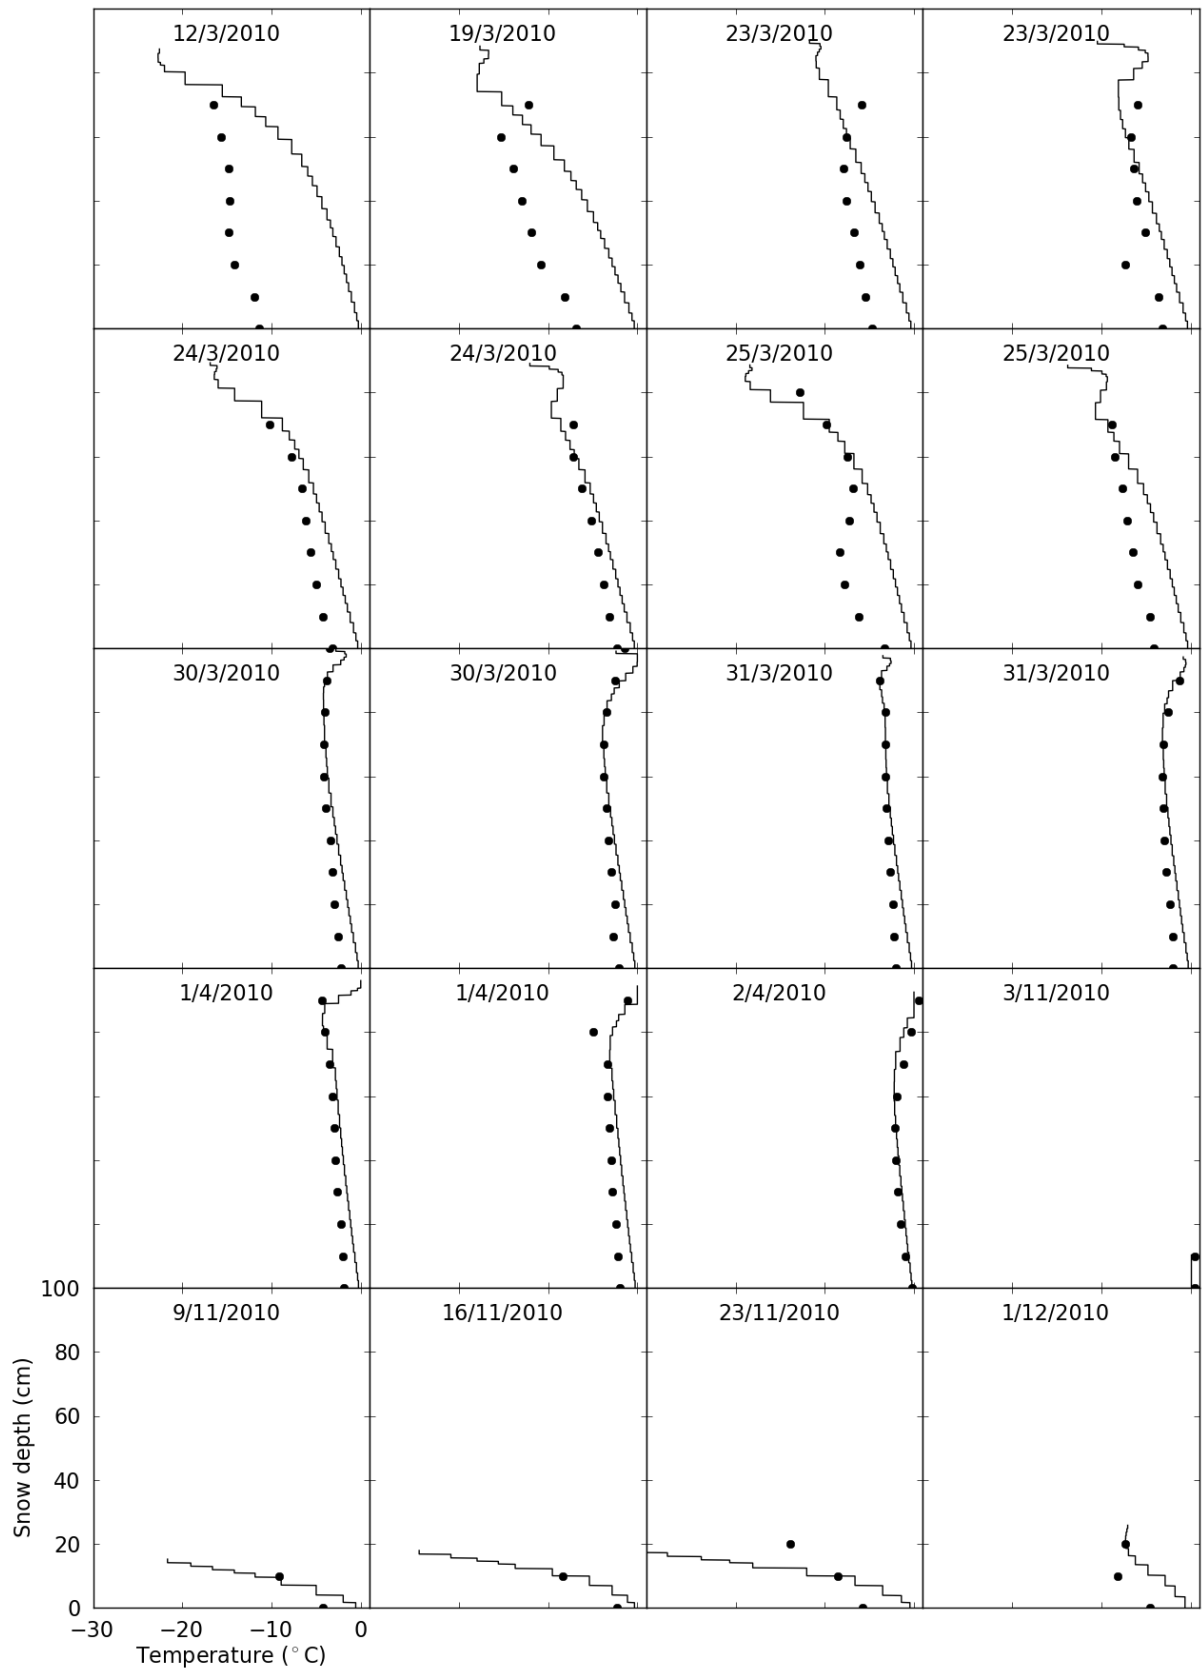

Figure S1. Continued

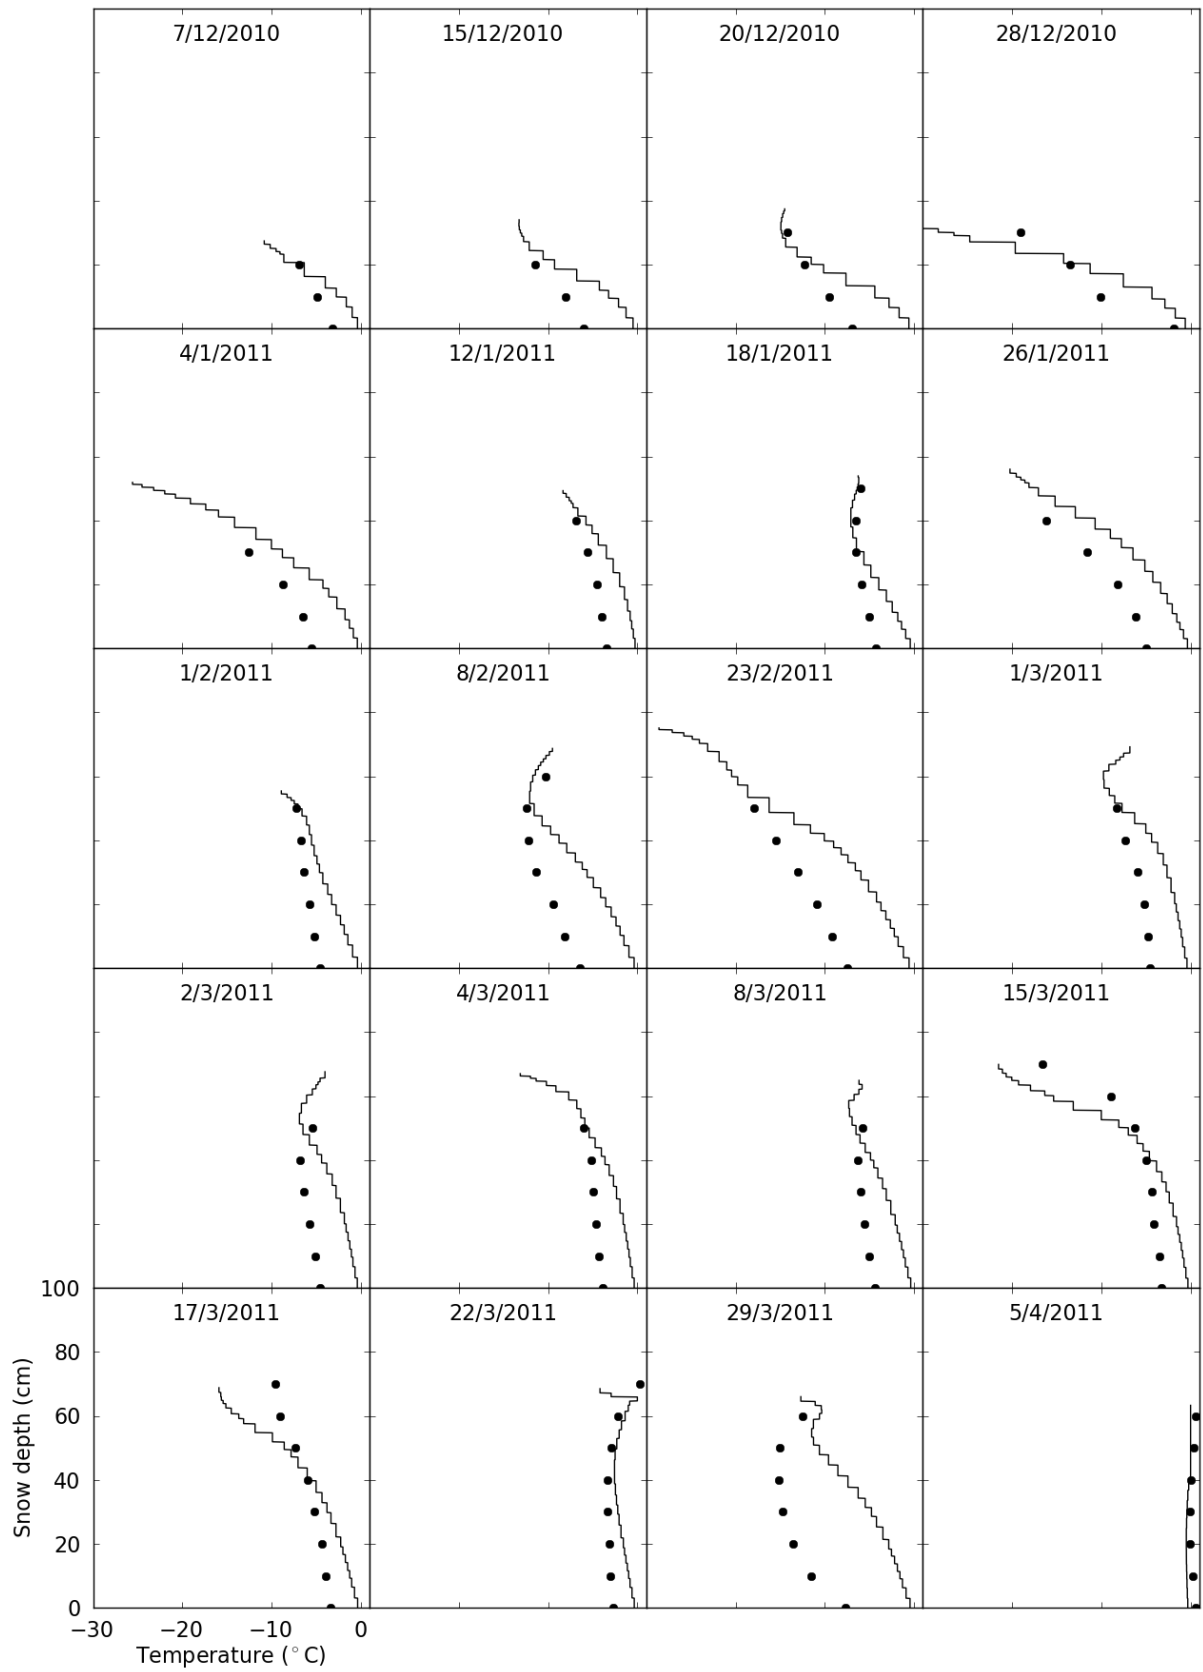

Figure S1. Continued

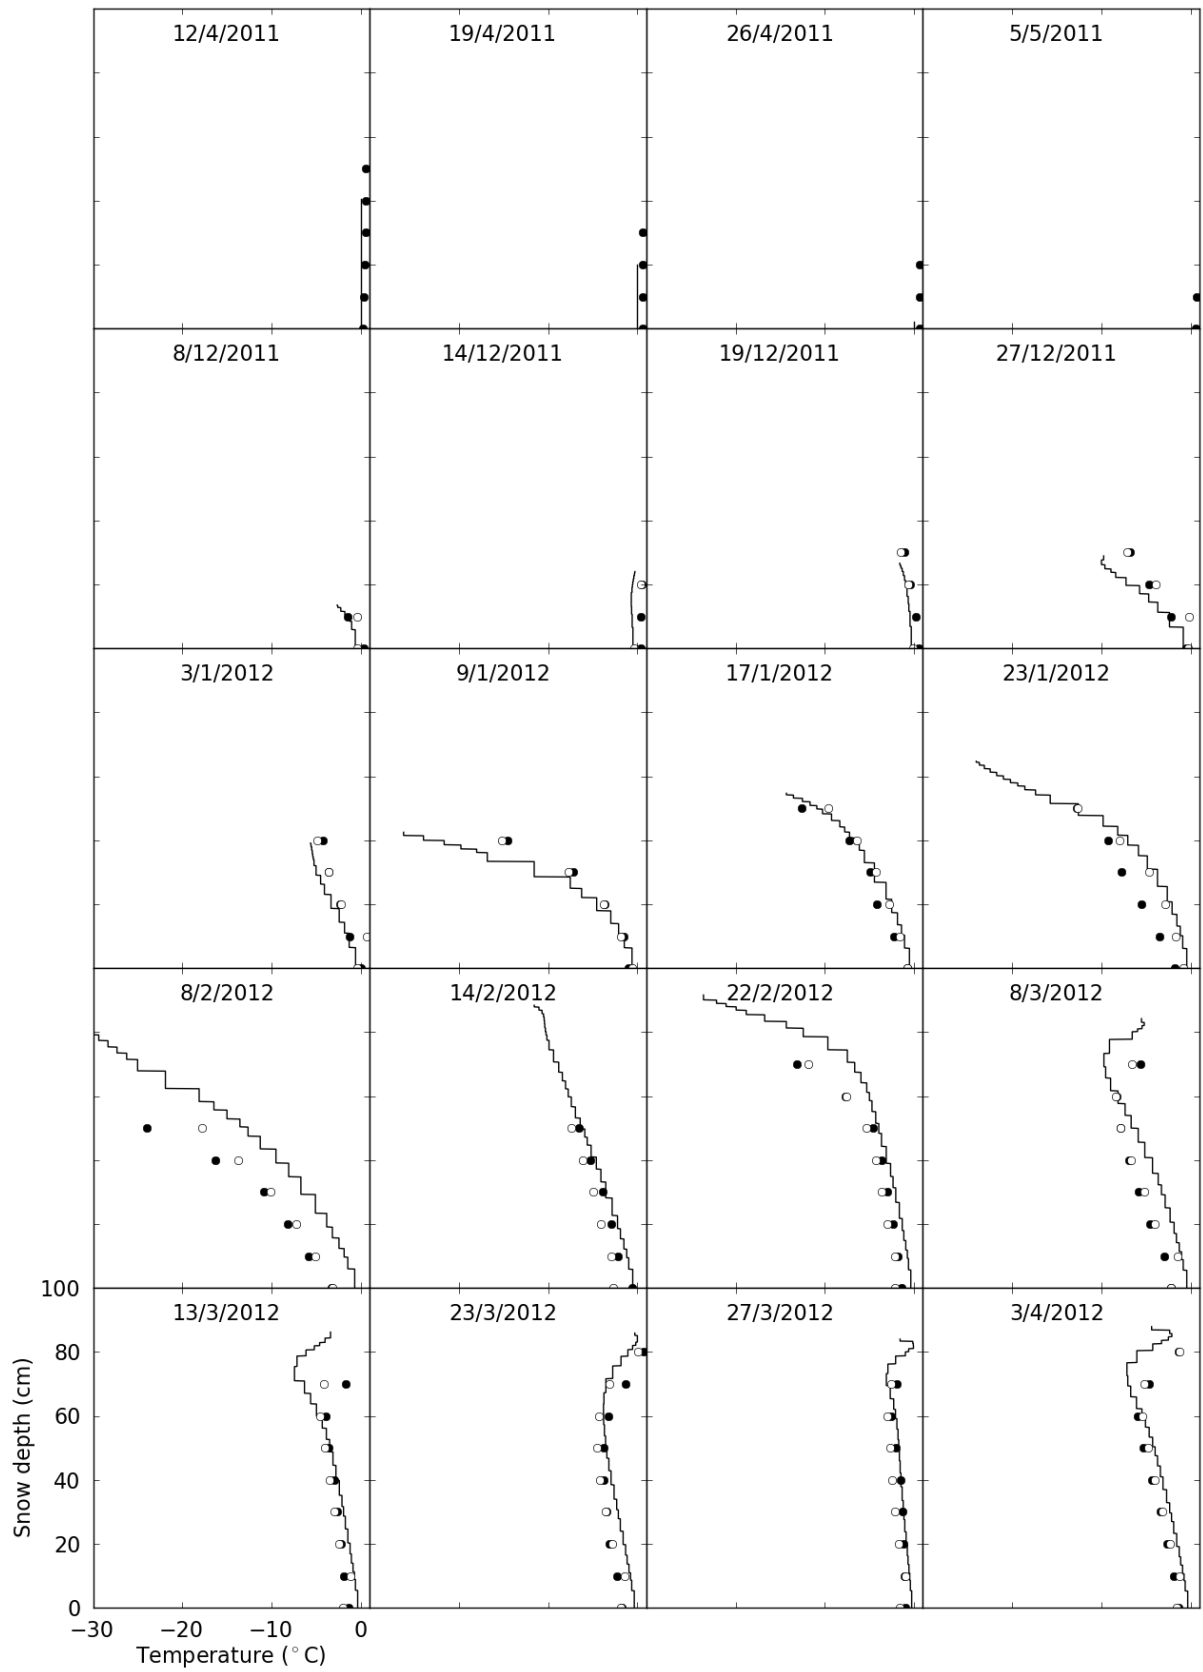

Figure S1. Continued

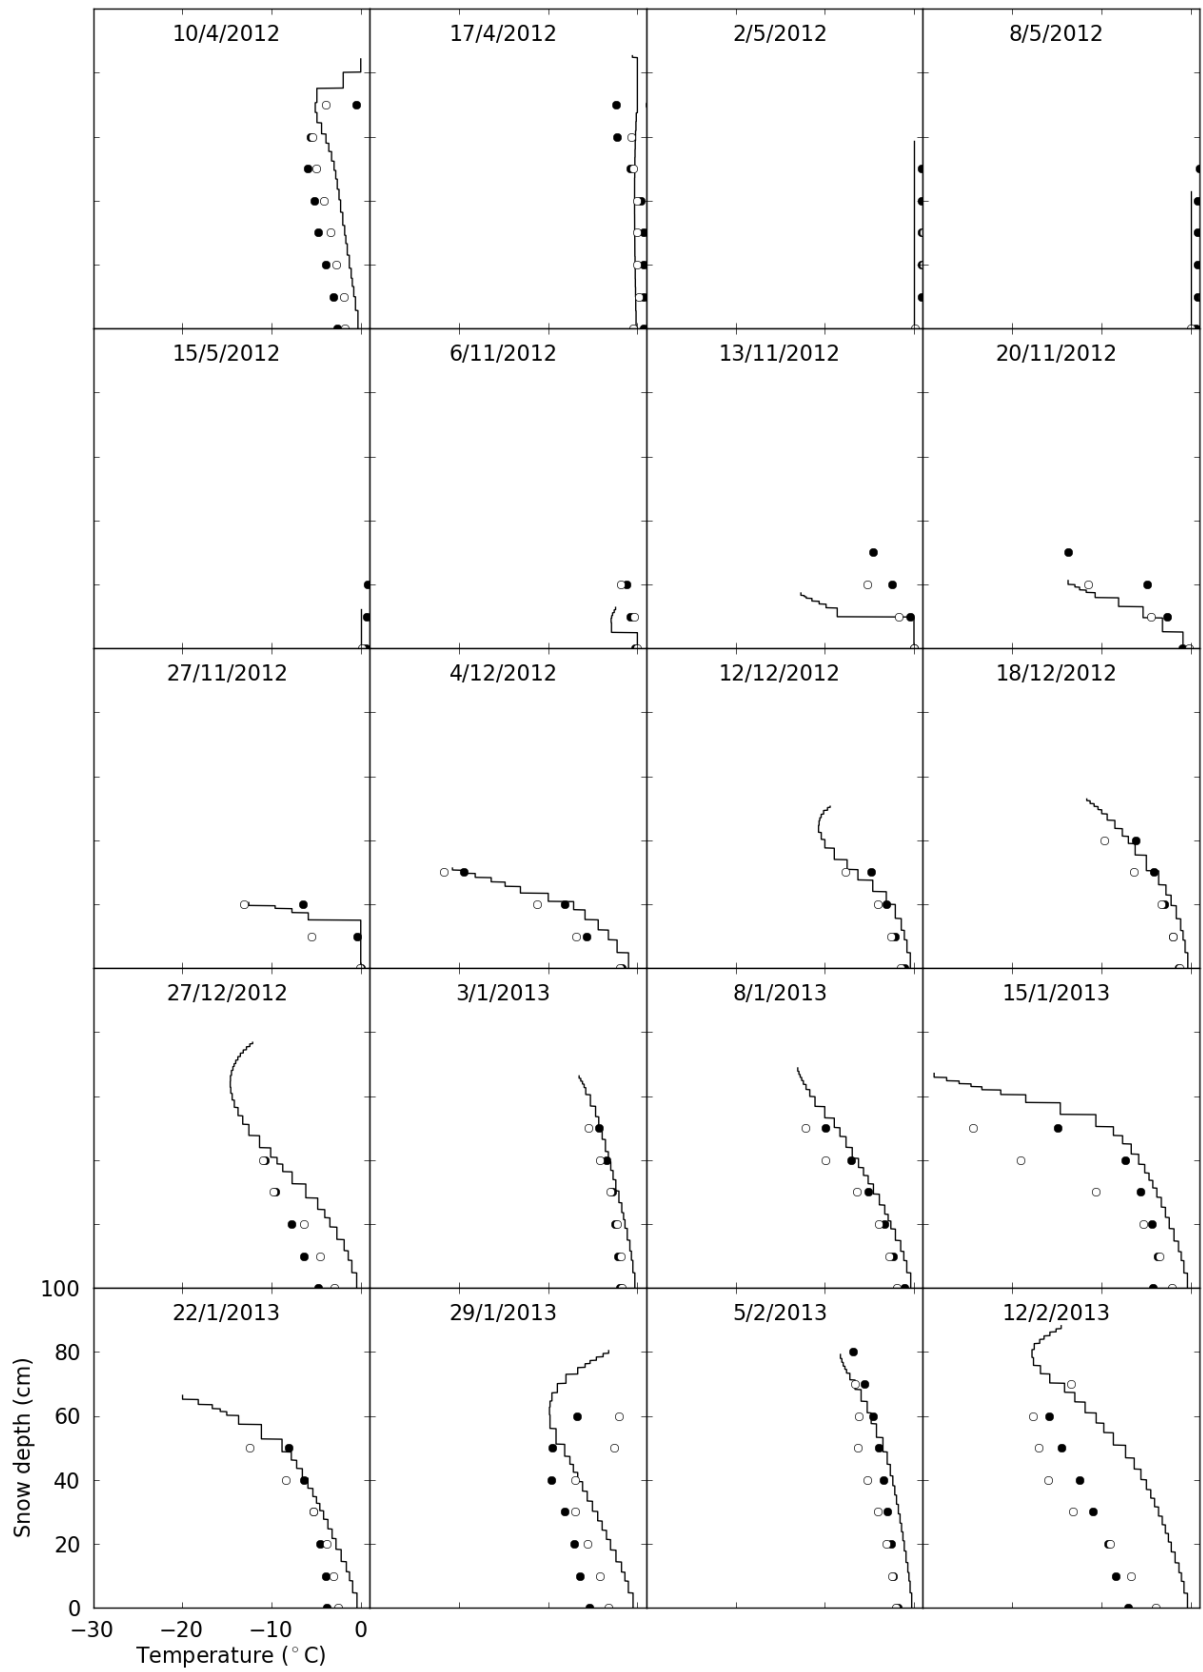

Figure S1. Continued

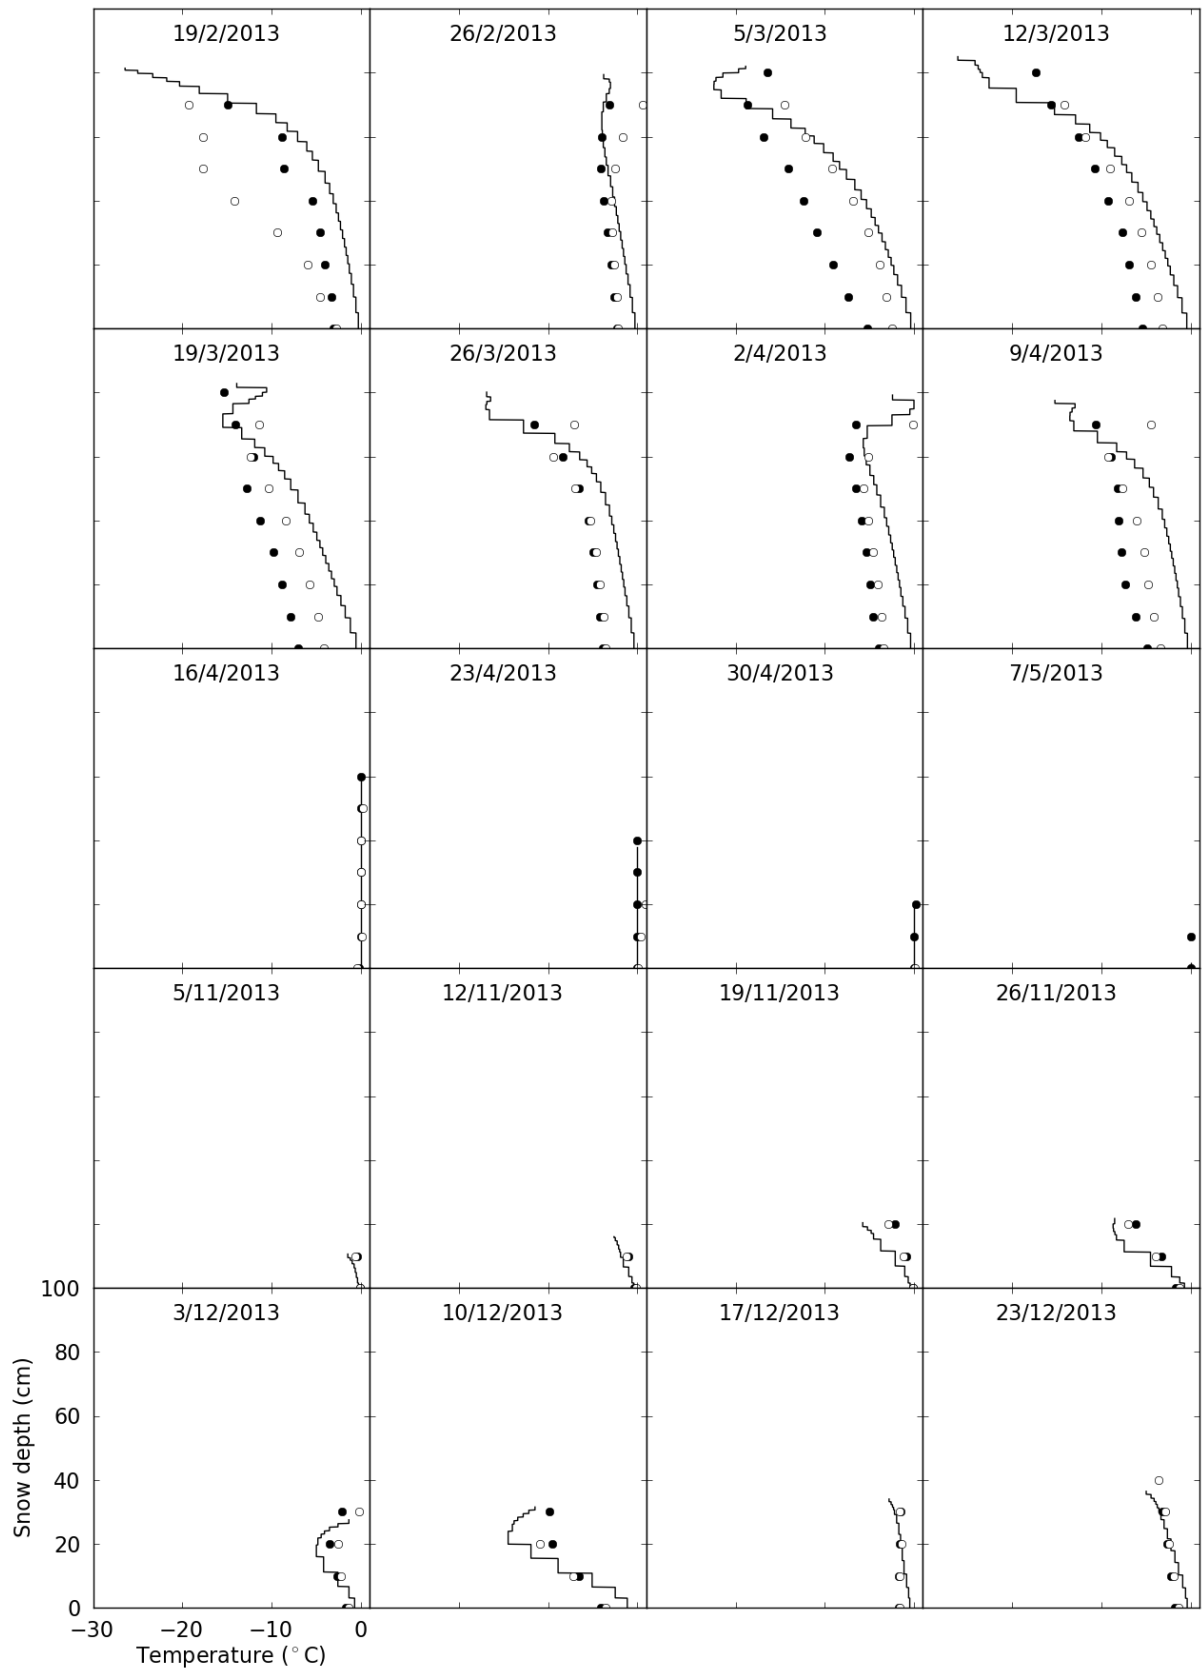

Figure S1. Continued

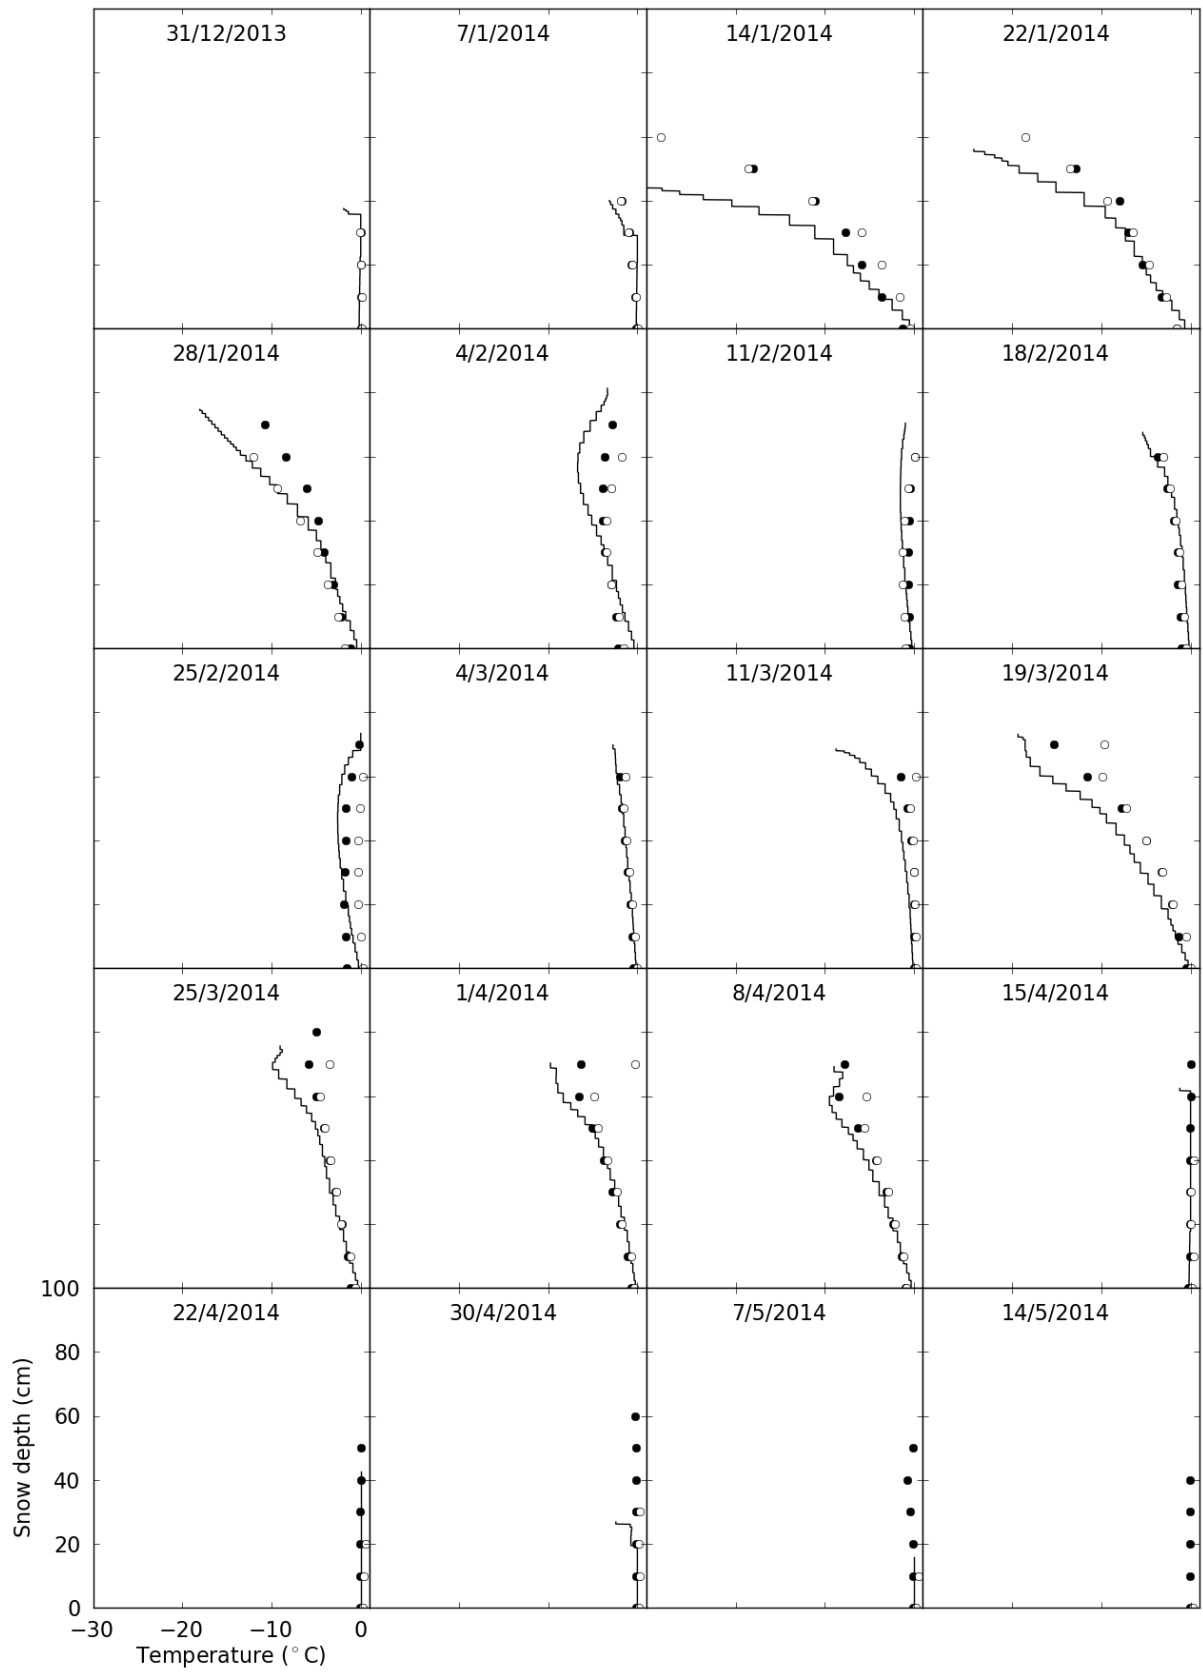

Supplement: Supplementary file 1 [file gi-2015-35-supplement.pdf]
